# Supplementary material for: Stuck in the middle: a systematic review of authorship in collaborative health research in Africa, 2014–2016
Source: PubMed Central journal article supplement — BMJ Glob Health. 2019 Oct 18;4(5):e001853. doi: 10.1136/bmjgh-2019-001853 (PMC6830050; doi:10.1136/bmjgh-2019-001853), 2019-10-18
Supplement: bmjgh-2019-001853supp001.pdf [file bmjgh-2019-001853supp001.pdf]

**Appendix: List of countries included in our analyses, along with regional groupings. For each country, we report the number of papers included, number and percent of papers with at least one local co-author, and number and percent of papers with a local first and/or last author.**

| Country                      | Regional grouping | Total Number of Papers | % of overall papers from that country | Papers with at least one author from the country of paper's focus |      | Papers with first and/or last author from the country of paper's focus |      |
|------------------------------|-------------------|------------------------|---------------------------------------|-------------------------------------------------------------------|------|------------------------------------------------------------------------|------|
|                              |                   |                        |                                       | n                                                                 | %    | n                                                                      | %    |
| Angola                       | Southern Africa   | 19                     | 0.3                                   | 11                                                                | 57.9 | 7                                                                      | 36.8 |
| Benin                        | West Africa       | 59                     | 0.8                                   | 48                                                                | 81.4 | 26                                                                     | 44.1 |
| Botswana                     | Southern Africa   | 58                     | 0.8                                   | 46                                                                | 79.3 | 28                                                                     | 48.3 |
| Burkina Faso                 | West Africa       | 135                    | 1.9                                   | 111                                                               | 82.2 | 61                                                                     | 45.2 |
| Burundi                      | East Africa       | 17                     | 0.2                                   | 11                                                                | 64.7 | 3                                                                      | 17.6 |
| Cameroon                     | Central Africa    | 195                    | 2.8                                   | 179                                                               | 91.8 | 139                                                                    | 71.3 |
| Cape Verde                   | West Africa       | 8                      | 0.1                                   | 5                                                                 | 62.5 | 1                                                                      | 12.5 |
| Central African Republic     | Central Africa    | 14                     | 0.2                                   | 12                                                                | 85.7 | 10                                                                     | 71.4 |
| Chad                         | Central Africa    | 14                     | 0.2                                   | 12                                                                | 85.7 | 3                                                                      | 21.4 |
| Congo                        | Central Africa    | 10                     | 0.1                                   | 8                                                                 | 80   | 6                                                                      | 60   |
| Democratic Republic of Congo | Central Africa    | 133                    | 1.9                                   | 101                                                               | 75.9 | 57                                                                     | 42.9 |
| Djibouti                     | East Africa       | 3                      | 0                                     | 2                                                                 | 66.7 | 2                                                                      | 66.7 |
| Equatorial Guinea            | Central Africa    | 7                      | 0.1                                   | 5                                                                 | 71.4 | 1                                                                      | 14.3 |
| Eritrea                      | East Africa       | 6                      | 0.1                                   | 5                                                                 | 83.3 | 4                                                                      | 66.7 |
| Ethiopia                     | East Africa       | 766                    | 10.8                                  | 686                                                               | 89.6 | 568                                                                    | 74.2 |
| Gabon                        | Central Africa    | 18                     | 0.3                                   | 15                                                                | 83.3 | 10                                                                     | 55.6 |
| Gambia                       | West Africa       | 34                     | 0.5                                   | 25                                                                | 73.5 | 17                                                                     | 50   |
| Ghana                        | West Africa       | 500                    | 7                                     | 411                                                               | 82.2 | 297                                                                    | 59.4 |
| Guinea                       | West Africa       | 40                     | 0.6                                   | 33                                                                | 82.5 | 15                                                                     | 37.5 |
| Guinea-Bissau                | West Africa       | 28                     | 0.4                                   | 24                                                                | 85.7 | 2                                                                      | 7.1  |
| Ivory Coast                  | West Africa       | 69                     | 1                                     | 54                                                                | 78.3 | 34                                                                     | 49.3 |
| Kenya                        | East Africa       | 619                    | 8.7                                   | 531                                                               | 85.8 | 333                                                                    | 53.8 |
| Lesotho                      | Southern Africa   | 21                     | 0.3                                   | 11                                                                | 52.4 | 6                                                                      | 28.6 |
| Liberia                      | West Africa       | 60                     | 0.9                                   | 44                                                                | 73.3 | 20                                                                     | 33.3 |
| Malawi                       | East Africa       | 278                    | 3.9                                   | 226                                                               | 81.3 | 96                                                                     | 34.5 |
| Mali                         | West Africa       | 45                     | 0.6                                   | 41                                                                | 91.1 | 24                                                                     | 53.3 |
| Mauritania                   | West Africa       | 13                     | 0.2                                   | 12                                                                | 92.3 | 12                                                                     | 92.3 |
| Mozambique                   | East Africa       | 129                    | 1.8                                   | 105                                                               | 81.4 | 43                                                                     | 33.3 |
| Namibia                      | Southern Africa   | 34                     | 0.5                                   | 22                                                                | 64.7 | 11                                                                     | 32.4 |
| Niger                        | West Africa       | 27                     | 0.4                                   | 22                                                                | 81.5 | 9                                                                      | 33.3 |
| Nigeria                      | West Africa       | 816                    | 11.5                                  | 756                                                               | 92.6 | 693                                                                    | 84.9 |
| Rwanda                       | East Africa       | 139                    | 2                                     | 108                                                               | 77.7 | 51                                                                     | 36.7 |
| Senegal                      | West Africa       | 105                    | 1.5                                   | 95                                                                | 90.5 | 77                                                                     | 73.3 |
| Sierra Leone                 | West Africa       | 89                     | 1.3                                   | 62                                                                | 69.7 | 19                                                                     | 21.3 |
| Somalia                      | East Africa       | 19                     | 0.3                                   | 6                                                                 | 31.6 | 4                                                                      | 21.1 |
| South Africa                 | Southern Africa   | 1,097                  | 15.5                                  | 1,034                                                             | 94.3 | 885                                                                    | 80.7 |
| South Sudan                  | East Africa       | 24                     | 0.3                                   | 10                                                                | 41.7 | 6                                                                      | 25   |

|           |                 |     |     |     |      |     |      |
|-----------|-----------------|-----|-----|-----|------|-----|------|
| Swaziland | Southern Africa | 27  | 0.4 | 16  | 59.3 | 6   | 22.2 |
| Tanzania  | East Africa     | 484 | 6.8 | 432 | 89.3 | 248 | 51.2 |
| Togo      | West Africa     | 17  | 0.2 | 15  | 88.2 | 10  | 58.8 |
| Uganda    | East Africa     | 608 | 8.6 | 531 | 87.3 | 321 | 52.8 |
| Zambia    | Southern Africa | 199 | 2.8 | 158 | 79.4 | 80  | 40.2 |
| Zimbabwe  | Southern Africa | 117 | 1.7 | 101 | 86.3 | 61  | 52.1 |
